*To the Editor:*—We concur generally with Dr. Bellville's warning of the complexity of drug interaction. But perhaps the phrases "the dubious assumption" and "*sine qua non*" are unnecessarily harsh and obscure the fact that a real interaction exists which was not found by Steen *et al.*<sup>1</sup> and not found to be statistically significant by Keats *et al.*<sup>2</sup> in their opioid ataractic experiments.

The 2 × 2 factorial design differs from ours in extent and in power. We thought it unnecessary to add 33 per cent to the extent of the experiment, especially as repeated comparisons of prior control vs. placebo responses of ventilation to CO<sub>2</sub> were made (although not reported) and found indistinguishable.<sup>3,4</sup>

Neither design would permit analysis of the mechanism of interaction. This requires data on the dose-response curves of the drugs and of mixtures, as clearly illustrated in Dr. Bellville's 1959 letter.<sup>5</sup> A beautiful example of such analysis is provided by Bellville and Fleischli's explanation of the sometimes puzzling lack of nalorphine antagonism of morphine.<sup>6</sup> But even here, in retrospect, one could wish that the zero morphine doses had been replaced by very large morphine doses. Such a 3 × 3 design requires nine weekly studies of each subject. Our data were col-

lected over a much shorter time, 10 to 22 days, permitting greater subject homogeneity and complete confounding of order effect, which tend to compensate for the reduced power of the analysis.

THEODORE C. SMITH, M.D.  
Associate Professor  
Department of Anesthesia  
University of Pennsylvania

#### REFERENCES

1. Steen SN, Urban BJ, Finn H, *et al*: Effects of some phenothiazines with and without meperidine on the respiratory response to carbon dioxide. *Anesth Analg Curr Res* 47:187, 1968
2. Keats AS, Telford J, Kurosu Y: "Potentiation" of meperidine by promethazine. *ANESTHESIOLOGY* 22:34, 1961
3. Smith TC, Stephens GW, Zeigler L, *et al*: Effects of premedicant drugs on respiration and gas exchange in man. *ANESTHESIOLOGY* 28: 883, 1967
4. Stephen CW, Banner MP, Wollman H, *et al*: Respiratory pharmacology of mixtures of scopolamine with secobarbital and with fentanyl. *ANESTHESIOLOGY* 31:237, 1967
5. Bellville JW: Potentiation (letter to the editor). *ANESTHESIOLOGY* 20:724, 1959
6. Bellville JW, Fleischli G.: The interaction of morphine and nalorphine on respiration. *Clin Pharmacol Ther* 9:152, 1968

### Magnesium and Neuromuscular Blocking Agents

*To the Editor:*—In the January 1970 issue of *ANESTHESIOLOGY*, Choneim and Long reported on the interaction of magnesium and neuromuscular blocking agents. Using the rat phrenic nerve-diaphragm preparation, they demonstrated that magnesium potentiates the action of both depolarizing and nondepolarizing blocking agents. Their discussion states that, in a review of the literature, only a suggestion was found to indicate that the effect of magnesium may be additive to that

of curare-like drugs. However, using a nerve-muscle preparation in the cat, Giesecke *et al.* showed, by the method of half doses, that the action of magnesium sulfate is additive to that of *d*-tubocurarine as well as to that of succinylcholine (Giesecke, Morris, Dalton and Stephen, *Anesth. Analg.* 47: 689, 1968).

GERTIE F. MARX, M.D.  
Albert Einstein College of Medicine  
Yeshiva University  
New York, New York
